# Supplementary material for: The effects of fluorinated metal–organic frameworks as additives in polymer-based electrolytes for all-solid-state lithium batteries
Source: Royal Society of Chemistry journal article supplement (doi:10.1039/d4cc04826a), 2024-01-01
Supplement: d4cc04826a2.pdf [file d4cc04826a2.pdf]

## Supporting Information

### The Effects of Fluorinated Metal-Organic Frameworks as Additives in Polymer-Based Electrolytes for All-Solid-State Lithium Batteries

Liang He <sup>a</sup>, Zexi Di <sup>a</sup>, Jiaying Li <sup>a</sup>, Sijia Wang <sup>a</sup>, Wei Kong <sup>a</sup>, Ruiqi Li <sup>b</sup>, Arkadii Proskurin <sup>c</sup>, Changzhu Lv <sup>b,\*</sup>, Tao Wei <sup>a,\*</sup>

<sup>a</sup> *School of Energy and Power, Jiangsu University of Science and Technology, Zhenjiang 212003, China.*

<sup>b</sup> *Guangdong Advanced Carbon Materials Co., Ltd, 519000 Zhuhai, China.*

<sup>c</sup> *Admiral Makarov National University of Shipbuilding , Heroiv Ukrainy av. 9, 54025, Mykolaiv, Ukraine.*

---

\* Corresponding author: C. Lv ([lczo109@mail.ustc.edu.cn](mailto:lczo109@mail.ustc.edu.cn)).

\* Corresponding author: T. Wei ([wt863@just.edu.cn](mailto:wt863@just.edu.cn), [wt863@126.com](mailto:wt863@126.com)).

## 1. Materials

Zirconium(IV) chloride ( $\text{ZrCl}_4$ , 99.9%), N,N-dimethylformamide (DMF, 99.0%), Tetrafluoroterephthalic acid ( $\text{H}_2\text{TFBDC}$ ), N,N-dimethylacetamide (DMAc, 99.0%), Methanol (99.7%), PVDF-HFP ( $M_w \sim 400000$ ), Bis(trifluoromethane)sulfonimide lithium salt (LiTFSI, 99.0%) and 1-Methyl-2-pyrrolidone (NMP, 99.0%) were available from Aladdin; Acetic acid (99.5%), Acetone (99.0%), and Anhydrous ethanol (99.7%) were bought from Sinopharm.

## 2. Synthesis of UIO-66- $\text{F}_4(\text{Zr})$

UIO-66- $\text{F}_4(\text{Zr})$  was obtained by a simple solvothermal method (Scheme S1). Firstly, 5 mmol of  $\text{ZrCl}_4$  and 5 mmol of  $\text{H}_2\text{TFBDC}$  were dissolved in 50 ml aqueous glacial acetic acid solution ( $V_{\text{water}}: V_{\text{acetic acid}} = 3:2$ ) and sonicated for thirty minutes until the solution was clarified. The above solution was then transferred into a 100 ml Teflon autoclave and reacted at 110 °C for 24 h. After it was cooled to room temperature and centrifuged to obtain a white powder. The powder was washed three times with DMF and methanol, and finally dried at 80 °C overnight to obtain UIO-66- $\text{F}_4(\text{Zr})$  powder, which needed to be vacuum activated at 120 °C for 10 h.

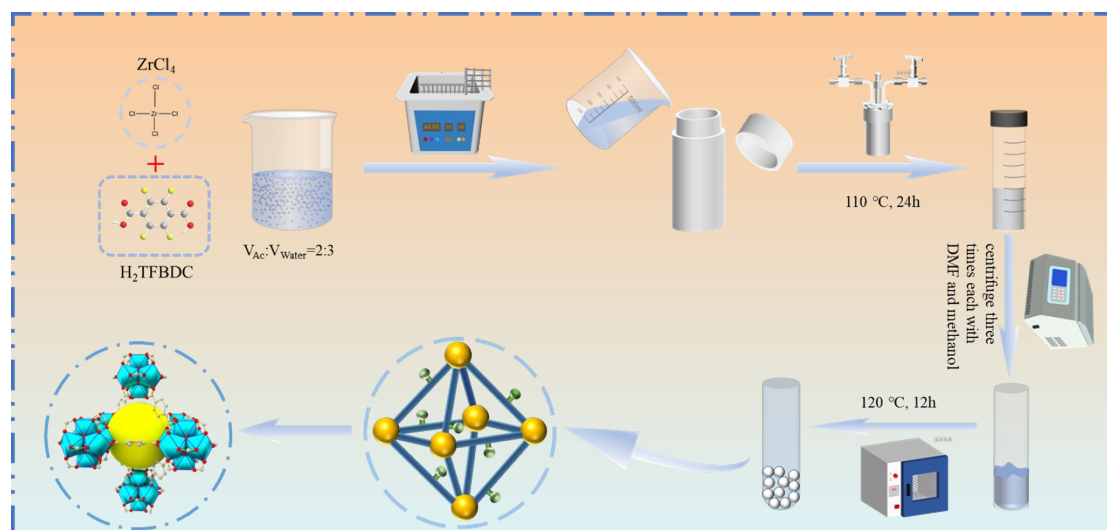

Scheme S1. Schematic diagram for the preparation of UIO-66- $\text{F}_4(\text{Zr})$

## 3. Preparation of SCEs

A coating method was used to prepare the SCEs. Initially, different mass ratios of LiTFSI, UIO-66- $\text{F}_4(\text{Zr})$ , and PVDF-HFP were dissolved in DMAc/Acetone

(V:V=2:1) and stirred for 3 h at 70 °C, then a homogeneous slurry was achieved by continuously stirred the mixture overnight at 40 °C. After that, the slurry was coated onto a polytetrafluoroethylene (PTFE) flat plate and vacuum dried at 60 °C for 12 h. Finally, the obtained film was punched into 18 mm diameter discs using a button cell punch and kept in the argon-filled glovebox. Table S1 shows the proportions of the various components in the SCEs, named SCE-0, SCE-1, SCE-2, and SCE-3, respectively.

Table S1 Components in different SCE membranes

| SCEs  | MOF/wt.% | PVDF-HFP/wt.% | LiTFSI/wt.% |
|-------|----------|---------------|-------------|
| SCE-0 | 0        | 70            | 30          |
| SCE-1 | 5        | 65            | 30          |
| SCE-2 | 10       | 60            | 30          |
| SCE-3 | 15       | 55            | 30          |

#### 4. Materials characterizations

The crystal structure of UIO-66-F<sub>4</sub>(Zr) powder was analyzed using X-ray diffraction (XRD) over a range of 5° to 50° at 2°/min. The surface morphology of UIO-66-F<sub>4</sub>(Zr) and SCEs films was characterized by a field emission scanning electron microscope. The elemental distribution uniformity of the SCEs films was observed by using energy-dispersive X-ray spectroscopy (EDS).

#### 5. Cell assembly and test

First, the LiFePO<sub>4</sub> (LFP) cathode was obtained by mixing the active material, conductive carbon black, and PVDF in a 7:2:1 ratio, and NMP as the solvent. The homogeneous slurry was subsequent coated onto aluminum foil and dried for approximately 6 h at 60 °C, after which it was further dried overnight in a vacuum oven at 120 °C. Coin cells were sequentially constructed with LFP, SCEs, and lithium metal. Additionally, cells with similar structures such as SS||SS, SS||Li and Li||Li were put together in a glove box.

## 6. Electrochemical performance

The electrochemical impedance spectroscopy (EIS) of the assembled SS/SCEs/SS cells were tested on a CHI660E electrochemical workstation at different temperatures (30 °C-90 °C). The EIS parameters were set between a frequency range of  $10^{-6}$  to  $10^{-1}$  Hz at an amplitude of 10 mV. The ionic conductivity ( $\sigma$ ) was then calculated using equation (1).

$$\sigma = \frac{L}{R \cdot S} \quad (1)$$

SS||Li cells were assembled, and the electrochemical window of the SCEs was studied by linear sweep voltammetry (LSV) under a scan rate of 1 mV/s and a voltage range of 2-7 V. Li||Li symmetrical cells were also assembled, and its initial interfacial resistance ( $R_0$ ) was measured using EIS at 60 °C. Finally, the steady-state interfacial resistance ( $R_{SS}$ ) was measured again using EIS. The lithium ion transference number ( $t_{Li^+}$ ) was calculated using equation (2), where  $\Delta V$  is the DC voltage of 10 mV,  $I_0$  is the initial current, and  $I_{SS}$  is the steady-state current.

$$t_{Li^+} = \frac{I_{SS}(\Delta V - I_0 R_0)}{I_0(\Delta V - I_{SS} R_{SS})} \quad (2)$$

Table S2 EDX spectral scanning results

| element | atomic number | normalized quality (%) | Atoms (%) |
|---------|---------------|------------------------|-----------|
| C       | 6             | 37.74                  | 49.56     |
| N       | 7             | 4.76                   | 5.36      |
| O       | 8             | 6.60                   | 6.50      |
| F       | 9             | 42.63                  | 35.39     |
| S       | 16            | 5.49                   | 2.70      |
| Zr      | 40            | 2.77                   | 0.48      |
|         |               | 100.00                 | 100.00    |

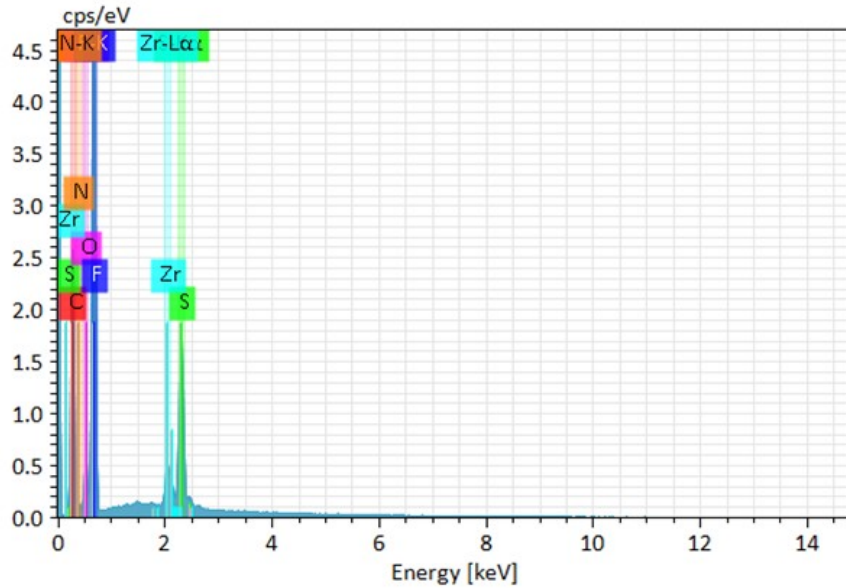

Figure S1. Individual elemental analysis diagram for EDX

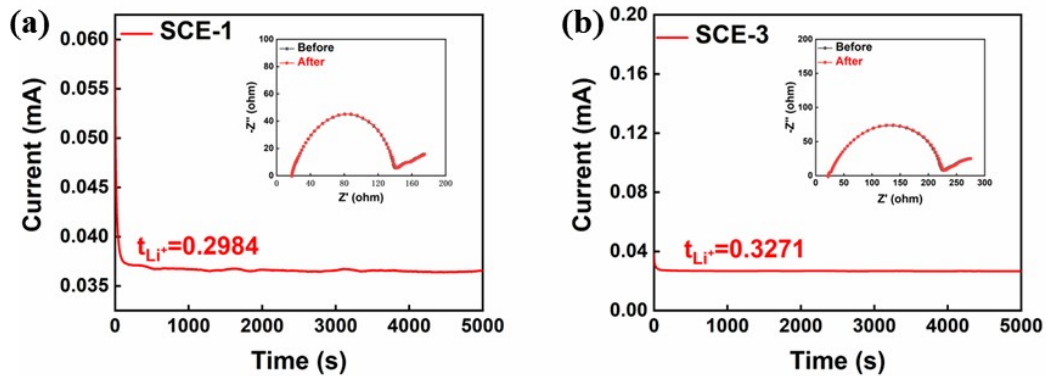

Figure S2. i-t profile of different SCEs-based symmetric Li/Li cells (the inset shows the electrochemical impedance spectroscopy curves before and after polarization). (a) SCE-1; (b)

SCE-3.

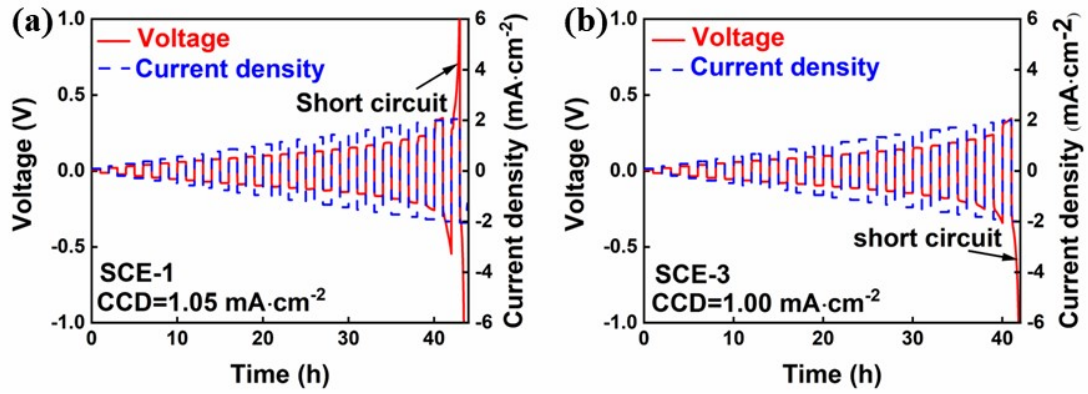

Figure S3. Galvanostatic cycling of (a) Li/SCE-1/Li and (b) Li/SCE-3/Li cells at step-increased current densities.

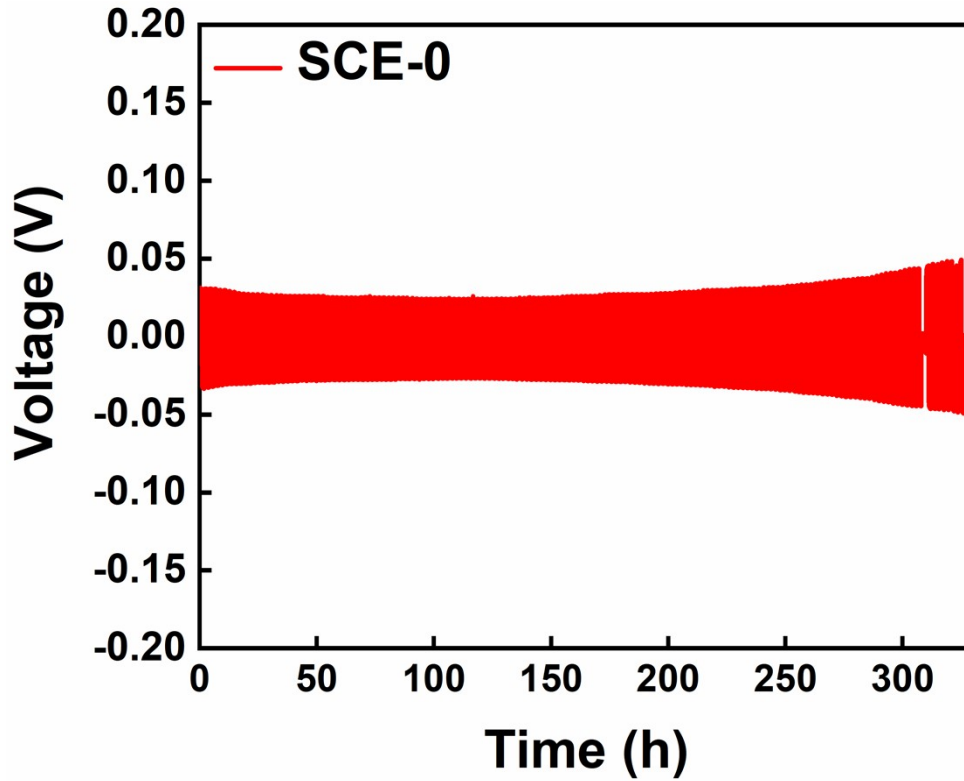

Figure S4 Constant current cycling curve of the Li/SCE-0/Li cell at  $60^\circ\text{C}$  with a current density of  $0.1 \text{ mA cm}^{-2}$ .

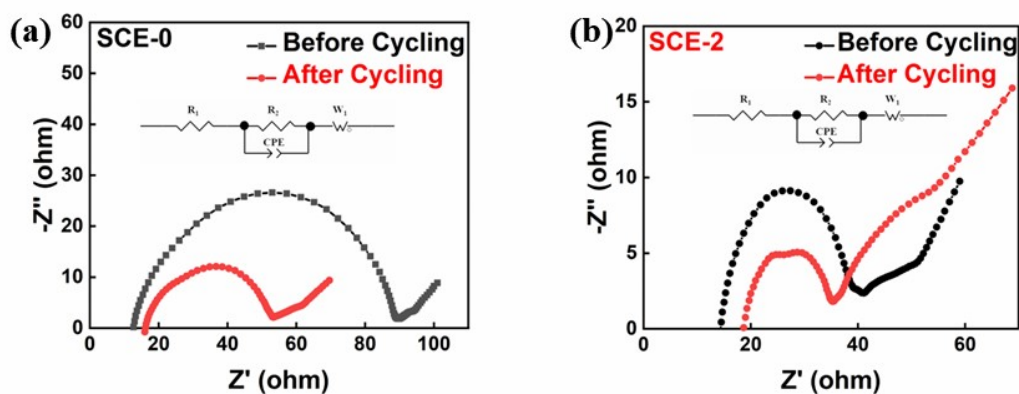

Figure S5. Nyquist plots of (a) SCE-0 and (b) SCE-2 batteries before cycling (black) and after 100 cycles (red) at  $0.1 \text{ mA cm}^{-2}$  at  $60 \text{ }^\circ\text{C}$ ; the inset is the equivalent circuit.

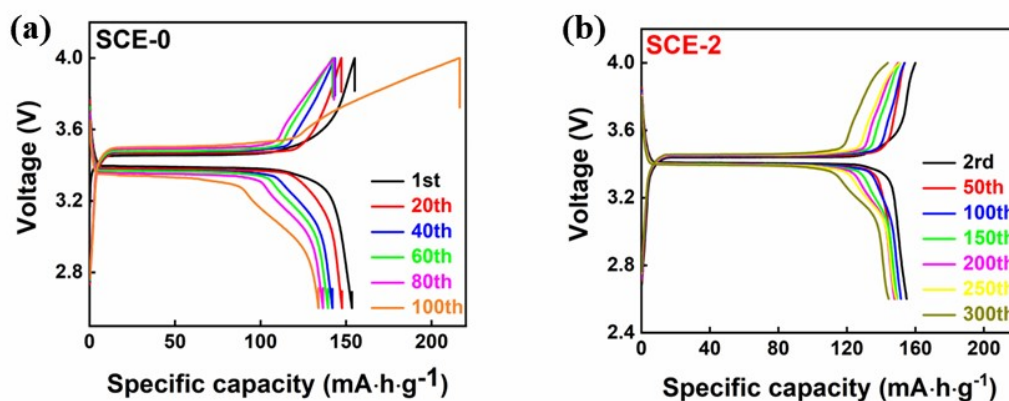

Figure S6. Voltage curves of charging-discharging processes in Li/SCEs/LFP cells at  $60 \text{ }^\circ\text{C}$ .  
(a) SCE-0. (b) SCE-2.

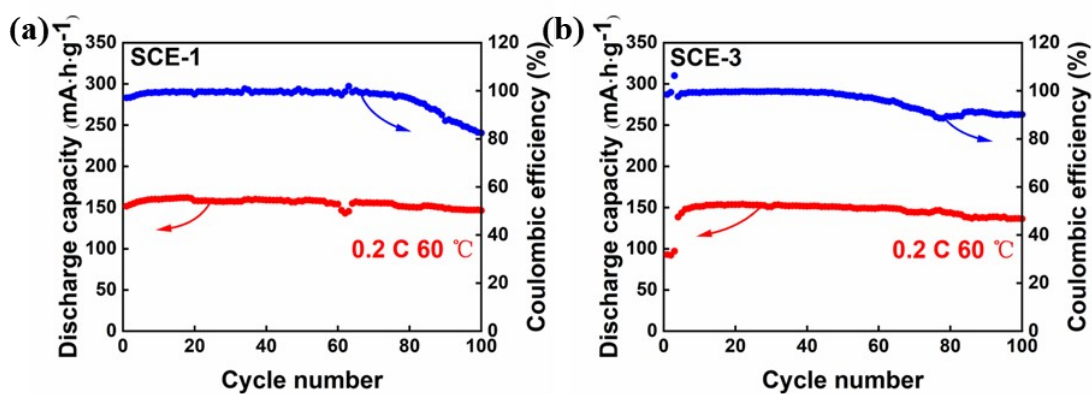

Figure S7. Full-cell cycling performance of SCEs at  $0.2 \text{ C}$ . (b) SCE-1; (c) SCE-3.

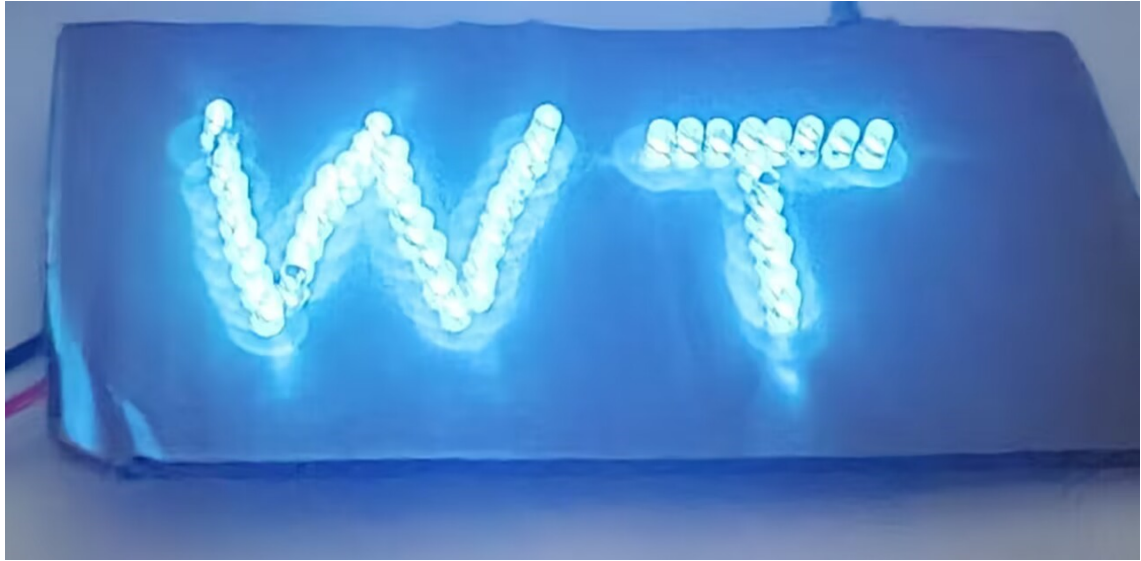

Figure S8. Optical photograph of SCE-2 powering an LED light.
